# Supplementary material for: Lipid Profiles in Out-of-Hospital Sudden Unexpected Death
Source: PubMed Central journal article supplement — Mayo Clin Proc Innov Qual Outcomes. 2018 Aug 24;2(3):257–66. doi: 10.1016/j.mayocpiqo.2018.06.010 (PMC6132208; doi:10.1016/j.mayocpiqo.2018.06.010), 2018-08-24
Supplement: mmc1.pdf [file mmc1.pdf]

1 **Supplemental Tables:**

2

---

**Supplemental Table 1. Variable Definitions For OHSUD Victims and Control**

---

**Subjects**

---

|                 | OHSUD Victims                             | Control Subjects                               |
|-----------------|-------------------------------------------|------------------------------------------------|
|                 | Recorded BMI in most recent               | Recorded BMI in most recent                    |
|                 | medical record or calculated as           | medical record or calculated as                |
| Body Mass       | weight (kg)/height (m <sup>2</sup> ) from | weight (kg)/height (m <sup>2</sup> ) from most |
| Index (BMI)     | most recent same-day weight and           | recent same-day weight and height              |
|                 | height measurements found in              | measurements found in medical                  |
|                 | medical records.                          | records.                                       |
| Smoker          | Any history (current or past) of          | Any history (current or past) of               |
|                 | smoking per medical records.              | smoking per medical records.                   |
|                 | Any mention of the terms                  | ICD-9 and 10 codes:                            |
|                 | ‘Coronary Artery Disease                  | 414.01, 414.06, 414.12, 414.2,                 |
|                 | (CAD)’, ‘Atherosclerotic Heart            | 414.20, 746.85, 429.2, 429.20,                 |
|                 | Disease (ASHD)’, ‘stent’,                 | V45.82, 414, 410, 414, 410.01,                 |
|                 | ‘coronary stent’, ‘Coronary               | 410.02, 410.1, 410.11, 410.12,                 |
| Coronary Artery | Artery Bypass Graft (CABG)’,              | 410.2, 410.21, 410.22, 410.3,                  |
| Disease         | ‘history of Myocardial Infarction         | 410.31, 410.32, 410.4, 410.41,                 |
|                 | (MI)’, ‘Atherosclerotic                   | 410.42, 410.5, 410.51, 410.52,                 |
|                 | Cardiovascular Disease’,                  | 410.8, 410.81, 410.82, 410.9,                  |
|                 | ‘coronary re-vascularization of           | 410.91, 410.92, 411.81, 412,                   |
|                 | coronary stent’, ‘PCI’, ‘NSTEMI’          | 429.79                                         |
|                 | or ‘STEMI’ in medical records.            |                                                |

|              |                                    |                                    |
|--------------|------------------------------------|------------------------------------|
|              |                                    | ICD-9 and 10 codes:                |
|              |                                    | 401, 401.1, 401.9, 402, 402.01,    |
|              |                                    | 402.1, 402.11, 402.9, 402.91,      |
|              | Any mention of the terms           | 405.19, 405.09, 405.99, 403,       |
|              | ‘hypertension (HTN)’, ‘high        | 403.01, 403.1, 403.11, 403.9,      |
| Hypertension | blood pressure’ or ‘hypertensive   | 403.91, 404, 404.01, 404.02,       |
|              | heart disease’ in medical records. | 404.03, 404.1, 404.11, 404.12,     |
|              |                                    | 404.13, 404.9, 404.91, 404.92,     |
|              |                                    | 404.93, 405.01, 405.11, 405.91     |
|              |                                    | ICD-9 and 10 codes                 |
|              |                                    | 249, 249.01, 249.1, 249.11, 249.2, |
|              |                                    | 249.21, 249.3, 249.31, 249.4,      |
|              |                                    | 249.41, 249.5, 249.51, 249.6,      |
|              |                                    | 249.61, 249.7, 249.71, 249.8,      |
|              |                                    | 249.81, 249.9, 249.91, 250,        |
|              | Any mention of ‘diabetes’ or       | 250.01, 250.02, 250.03, 250.1,     |
| Diabetes     | ‘diabetes mellitus’ in medical     | 250.11, 250.12, 250.13, 250.2,     |
| Mellitus     | records.                           | 250.21, 250.22, 250.23, 250.3,     |
|              |                                    | 250.31, 250.32, 250.33, 250.4,     |
|              |                                    | 250.41, 250.42, 250.43, 250.5,     |
|              |                                    | 250.51, 250.52, 250.53, 250.6,     |
|              |                                    | 250.61, 250.62, 250.63, 250.7,     |
|              |                                    | 250.71, 250.72, 250.73, 250.8,     |
|              |                                    | 250.81, 250.82, 250.83, 250.9,     |

250.91, 250.92, 250.93, 357.2,  
362.01, 362.02, 362.03, 362.04,  
362.05, 362.06, 366.41

Dyslipidemia      Any mention of ‘dyslipidemia’,  
                         ‘hypercholesterolemia’,  
                         ‘hypertriglyceridemia’,  
                         ‘hyperlipidemia (HLD/HL)’,      ICD-9 and 10 codes:  
                         ‘familial      272,272.1,272.2,272.3,272.4,414.3  
                         hypercholesterolemia(FH)’, ‘high      ,272.8,272.9  
                         LDL’, ‘high cholesterol’,  
                         ‘high/elevated/hyper  
                         triglycerides’, ‘lipid disorder’ in  
                         medical records.

- 
- 1
  - 2
  - 3
  - 4
  - 5
  - 6
  - 7
  - 8
  - 9
  - 10
  - 11

**Supplemental Table 2. Comparison Between Mean Values (in mg/dL) and Odds of OHSUD Associated with LDL-C and LDL/HDL, Using Both Calculated and Direct LDL (n=1,091) vs. Using Only Calculated LDL Values (N=481) for OHSUD Victims and Controls<sup>a,b</sup>**

|             | Mean (Standard Deviation) |                              |                       |                              | Odds Ratio (95% Confidence Interval) |                         |                         |                         |
|-------------|---------------------------|------------------------------|-----------------------|------------------------------|--------------------------------------|-------------------------|-------------------------|-------------------------|
|             | OHSUD Victims             |                              | Controls              |                              | Model 1 <sup>c</sup>                 |                         | Model 2 <sup>d</sup>    |                         |
|             | All<br>LDL<br>(n=135)     | Calculated<br>LDL<br>(n=128) | All<br>LDL<br>(n=914) | Calculated<br>LDL<br>(n=353) | All<br>LDL                           | Calculated<br>LDL       | All<br>LDL              | Calculated<br>LDL       |
| LDL         | 90.9<br>(39.6)            | 90.8 (40)                    | 109.6<br>(35.2)       | 108.9<br>(35.3)              | 0.30<br>(0.18-<br>0.5)               | 0.31<br>(0.19-<br>0.57) | 0.32<br>(0.18-<br>0.56) | 0.32<br>(0.17-<br>0.59) |
| LDL/<br>HDL | 2.1<br>(1.2)              | 2.1 (1.22)                   | 2.2 (1)               | 2.1 (1)                      | 0.94<br>(0.78-<br>1.13)              | 0.95<br>(0.78-<br>1.16) | 0.88<br>(0.72-<br>1.07) | 0.88<br>(0.71-1.1)      |

<sup>a</sup>OHSUD (Out-of-Hospital Sudden Unexpected Death); NHANES (National Health and Nutrition Examination Survey); HDL (High-density Lipoprotein); LDL (Low-density Lipoprotein); TG (Triglycerides); TC (Total Cholesterol)

<sup>b</sup>SI conversion factors: to convert mg/dL to mmol/L multiply by 38.67

<sup>c</sup> Model 1 – Unadjusted

<sup>d</sup> Model 2 - Adjusted for age, sex

**Supplemental Table 3. Odds Ratios (95% Confidence Interval) of Out-of-Hospital Sudden Unexpected Death Associated with Different Lipid Measures Adjusted for Age and Sex (Model 2) vs. Adjusted for Age, Sex and Race (Black and White Races Only)**

|                                                   | Adjusted for Age,<br>Sex | Adjusted for Age, Sex,<br>Race |
|---------------------------------------------------|--------------------------|--------------------------------|
| Total Cholesterol (highest vs. lowest quartile)   | 0.43 (0.25-0.74)         | 0.43 (0.25-0.75)               |
| Triglycerides (highest vs. lowest quartile)       | 1.00 (1.00-1.00)         | 0.84 (0.48-1.48)               |
| HDL-Cholesterol (highest vs. lowest quartile)     | 0.64 (0.37-1.13)         | 0.67 (0.38-1.18)               |
| LDL-Cholesterol (highest vs. lowest quartile)     | 0.32 (0.18-0.56)         | 0.31 (0.18-0.56)               |
| Non-HDL Cholesterol (highest vs. lowest quartile) | 0.45 (0.27-0.75)         | 0.44 (0.26-0.74)               |
| TG/HDL (per unit increase)                        | 1.08 (1.03-1.12)         | 1.08 (1.03-1.13)               |
| TC/HDL (per unit increase)                        | 1.04 (0.9-1.19)          | 1.04 (0.9-1.2)                 |
| LDL/HDL (per unit increase)                       | 0.88 (0.72-1.07)         | 0.87 (0.71-1.06)               |

<sup>a</sup>HDL (High-density Lipoprotein); LDL (Low-density Lipoprotein); TG (Triglycerides); TC (Total Cholesterol)

1  
2  
3  
4

**Supplemental Table 4. Odds Ratios (95% Confidence Interval) of Out-of-Hospital Sudden Unexpected Death Associated with Different Lipid Measures, Stratified by Age<sup>a</sup>**

|                                                      | Overall (n=1107)                 |                                  | Age ≤45<br>(OHSUD n=16; Local Controls n=302) |                      | Age >45<br>(OHSUD n=123; Local Controls n=666) |                     |
|------------------------------------------------------|----------------------------------|----------------------------------|-----------------------------------------------|----------------------|------------------------------------------------|---------------------|
|                                                      | Model 1 <sup>b</sup><br>(95% CI) | Model 2 <sup>c</sup><br>(95% CI) | Model 1<br>(95% CI)                           | Model 2<br>(95% CI)  | Model 1<br>(95% CI)                            | Model 2<br>(95% CI) |
| Total Cholesterol<br>(highest vs. lowest quartile)   | 0.4<br>(0.25-0.65)               | 0.43<br>(0.25-0.74)              | 1.36<br>(0.38-4.91)                           | 0.99<br>(0.26-3.77)  | 0.46<br>(0.28-0.77)                            | 0.37<br>(0.19-0.70) |
| Triglycerides<br>(highest vs. lowest quartile)       | 1.00<br>(1.00-1.00)              | 1.00<br>(1.00-1.00)              | 3.61<br>(0.87-15.04)                          | 2.72<br>(0.62-11.91) | 0.83<br>(0.48-1.42)                            | 0.66<br>(0.34-1.27) |
| HDL-Cholesterol<br>(highest vs. lowest quartile)     | 0.43<br>(0.27-0.70)              | 0.64<br>(0.37-1.13)              | 0.81<br>(0.19-3.35)                           | 1.43<br>(0.29-7.00)  | 0.42<br>(0.25-0.70)                            | 0.51<br>(0.26-0.98) |
| LDL-Cholesterol<br>(highest vs. lowest quartile)     | 0.30<br>(0.18-0.50)              | 0.32<br>(0.18-0.56)              | 0.71<br>(0.16-3.1)                            | 0.47<br>(0.1-2.19)   | 0.24<br>(0.14-0.43)                            | 0.34<br>(0.18-0.64) |
| Non-HDL Cholesterol<br>(highest vs. lowest quartile) | 0.46<br>(0.28-0.73)              | 0.45<br>(0.27-0.75)              | 0.49<br>(0.11-2.12)                           | 0.84<br>(0.21-3.35)  | 0.35<br>(0.21-0.58)                            | 0.42<br>(0.23-0.77) |

lowest quartile)

|                             |                     |                     |                     |                     |                     |                     |
|-----------------------------|---------------------|---------------------|---------------------|---------------------|---------------------|---------------------|
| TG/HDL (per unit increase)  | 1.10<br>(1.05-1.15) | 1.08<br>(1.03-1.12) | 1.15<br>(1.00-1.33) | 1.13<br>(0.98-1.30) | 1.08<br>(1.03-1.14) | 1.06<br>(1.00-1.13) |
| TC/HDL (per unit increase)  | 1.12<br>(0.99-1.26) | 1.04<br>(0.9-1.19)  | 1.31<br>(0.94-1.84) | 1.16<br>(0.79-1.69) | 1.07<br>(0.93-1.22) | 1.06<br>(0.90-1.25) |
| LDL/HDL (per unit increase) | 0.94<br>(0.78-1.13) | 0.88<br>(0.72-1.07) | 1.01<br>(0.57-1.77) | 0.84<br>(0.45-1.57) | 0.91<br>(0.75-1.11) | 0.93<br>(0.74-1.18) |

---

<sup>a</sup>OHSUD (Out-of-Hospital Sudden Unexpected Death); HDL (High-density Lipoprotein); LDL (Low-density Lipoprotein); TG (Triglycerides); TC (Total Cholesterol)

<sup>b</sup>Model 1 – Unadjusted

<sup>c</sup>Model 2 - Adjusted for age, sex

---

1  
2  
3  
4  
5  
6  
7  
8  
9  
10  
11

**Supplemental Table 5. Odds Ratios (95% Confidence Interval) of Out-of-Hospital Sudden Unexpected Death Associated with Different Lipid Measures Stratified by Sex<sup>a</sup>**

|                                                   | Male (n=525)         |                                  | Female (n=582)      |                                  |
|---------------------------------------------------|----------------------|----------------------------------|---------------------|----------------------------------|
|                                                   | Model 1 <sup>b</sup> | Model 2 <sup>c</sup>             | Model 1             | Model 2                          |
|                                                   | (95% CI)             | (95% CI)                         | (95% CI)            | (95% CI)                         |
| Total Cholesterol (highest vs. lowest quartile)   | 0.56<br>(0.30-1.03)  | 0.65 <sup>d</sup><br>(0.33-1.28) | 0.31<br>(0.14-0.72) | 0.21 <sup>d</sup><br>(0.09-0.51) |
| Triglycerides (highest vs. lowest quartile)       | 1.03<br>(0.54-2.00)  | 0.87<br>(0.41-1.82)              | 0.92<br>(0.41-2.09) | 0.72<br>(0.31-1.7)               |
| HDL-Cholesterol (highest vs. lowest quartile)     | 1.02<br>(0.53-1.99)  | 0.96<br>(0.46-2.01)              | 0.56<br>(0.23-1.37) | 0.53<br>(0.20-1.36)              |
| LDL-Cholesterol (highest vs. lowest quartile)     | 0.3<br>(0.16-0.57)   | 0.39<br>(0.20-0.79)              | 0.3<br>(0.12-0.74)  | 0.22<br>(0.09-0.57)              |
| Non-HDL Cholesterol (highest vs. lowest quartile) | 0.41<br>(0.22-0.74)  | 0.54<br>(0.28-1.04)              | 0.47<br>(0.21-1.03) | 0.35<br>(0.15-0.8)               |
| TG/HDL (per unit increase)                        | 1.08<br>(1.02-1.14)  | 1.08<br>(1.03-1.14)              | 1.09<br>(1.00-1.17) | 1.06<br>(0.97-1.15)              |
| TC/HDL (per unit increase)                        | 1.03                 | 1.07                             | 0.99                | 0.96                             |



|                             |        |        |            |        |
|-----------------------------|--------|--------|------------|--------|
|                             | (0.88- | (0.91- | (0.76-1.3) | (0.74- |
|                             | 1.20)  | 1.27)  |            | 1.25)  |
| LDL/HDL (per unit increase) | 0.87   | 0.95   | 0.74       | 0.72   |
|                             | (0.70- | (0.75- | (0.50-     | (0.48- |
|                             | 1.09)  | 1.20)  | 1.09)      | 1.06)  |

---

<sup>a</sup>OHSUD (Out-of-Hospital Sudden Unexpected Death); HDL (High-density Lipoprotein);

LDL (Low-density Lipoprotein); TG (Triglycerides); TC (Total Cholesterol)

<sup>b</sup>Model 1 – Unadjusted

<sup>c</sup>Model 2 - Adjusted for age, sex

<sup>d</sup> $P < 0.05$

---

1  
2  
3  
4  
5  
6  
7  
8  
9  
10  
11  
12  
13  
14  
15

**Supplemental Table 6. Odds Ratios (95% Confidence Interval) of Out-of-Hospital Sudden Unexpected Death Associated with Different Lipid Measures Stratified by a Diagnosis of Coronary Artery Disease (CAD)<sup>a</sup>**

|                                                   | CAD (n=82)                       |                                | No CAD (n=1,025)    |                     |
|---------------------------------------------------|----------------------------------|--------------------------------|---------------------|---------------------|
|                                                   | Model 1 <sup>b</sup><br>(95% CI) | Model <sup>c</sup><br>(95% CI) | Model 1<br>(95% CI) | Model 2<br>(95% CI) |
| Total Cholesterol (highest vs. lowest quartile)   | 0.74<br>(0.24-2.34)              | 0.63<br>(0.18-2.27)            | 0.45<br>(0.25-0.81) | 0.45<br>(0.24-0.83) |
| Triglycerides (highest vs. lowest quartile)       | 0.28<br>(0.06-1.24)              | 0.19<br>(0.03-1.20)            | 1.07<br>(0.61-1.90) | 0.73<br>(0.39-1.35) |
| HDL-Cholesterol (highest vs. lowest quartile)     | 1.41<br>(0.23-8.5)               | 0.91<br>(0.1-7.90)             | 0.63<br>(0.36-1.09) | 0.91<br>(0.49-1.71) |
| LDL-Cholesterol (highest vs. lowest quartile)     | 1.05<br>(0.28-3.94)              | 0.63<br>(0.14-2.91)            | 0.32<br>(0.18-0.59) | 0.3<br>(0.16-0.57)  |
| Non-HDL Cholesterol (highest vs. lowest quartile) | 0.84<br>(0.27-2.64)              | 0.73<br>(0.20-2.60)            | 0.48<br>(0.28-0.83) | 0.42<br>(0.24-0.76) |
| TG/HDL (per unit increase)                        | 1.08<br>(0.97-1.2)               | 1.14<br>(0.99-1.31)            | 1.07<br>(1.02-1.12) | 1.06<br>(1.01-1.11) |
| TC/HDL (per unit increase)                        | 1.1<br>(0.84-1.45)               | 1.23<br>(0.89-1.69)            | 1.04<br>(0.89-1.21) | 0.95<br>(0.8-1.13)  |
| LDL/HDL (per unit increase)                       | 1.14<br>(0.75-1.73)              | 1.11<br>(0.68-1.80)            | 0.9<br>(0.73-1.13)  | 0.81<br>(0.64-1.03) |

<sup>a</sup>CAD (Coronary Artery Disease); HDL (High-density Lipoprotein); LDL (Low-density Lipoprotein); TG (Triglycerides); TC (Total Cholesterol)

<sup>b</sup>Model 1 – Unadjusted; <sup>c</sup>Model 2 - Adjusted for age, sex

**Supplementary Table 7. Odds Ratios (95% Confidence Interval) of Out-of-Hospital Sudden Unexpected Death Associated with Different Lipid Measures Among OHSUD Victims Meeting World Health Organization (WHO) Criteria for Sudden Cardiac Death (witnessed unexpected death within 1 hour of symptom onset, or death occurring less than 24 hours of the victim last being seen alive) vs. OHSUD Victims Not Meeting WHO Criteria (Non-WHO)<sup>a,e</sup>**

|                                                   | OHSUD Victims Meeting WHO Criteria (n=40) |                                  | OHSUD Victims Not Meeting WHO Criteria (n=99) |                                  |
|---------------------------------------------------|-------------------------------------------|----------------------------------|-----------------------------------------------|----------------------------------|
|                                                   | Model 1 <sup>b</sup><br>(95% CI)          | Model 2 <sup>c</sup><br>(95% CI) | Model 1<br>(95% CI)                           | Model 2<br>(95% CI)              |
| Total Cholesterol (highest vs. lowest quartile)   | 0.31<br>(0.12-0.80)                       | 0.38<br>(0.14-1.01)              | 0.44<br>(0.25-0.76)                           | 0.44<br>(0.24-0.81)              |
| Triglycerides (highest vs. lowest quartile)       | 3.29 <sup>d</sup><br>(1.18-9.13)          | 1.79<br>(0.62-5.16)              | 0.86*<br>(0.49-1.50)                          | 0.54<br>(0.29-1.03)              |
| HDL-Cholesterol (highest vs. lowest quartile)     | 0.24<br>(0.09-0.60)                       | 0.4<br>(0.14-1.11)               | 0.55<br>(0.32-0.94)                           | 0.78<br>(0.41-1.50)              |
| LDL-Cholesterol (highest vs. lowest quartile)     | 0.23<br>(0.08-0.63)                       | 0.26<br>(0.09-0.72)              | 0.32<br>(0.18-0.58)                           | 0.34<br>(0.18-0.63)              |
| Non-HDL Cholesterol (highest vs. lowest quartile) | 0.52<br>(0.23-1.16)                       | 0.49<br>(0.22-1.13)              | 0.43<br>(0.25-0.75)                           | 0.42<br>(0.23-0.78)              |
| TG/HDL (per unit increase)                        | 1.16<br>(1.09-1.24)                       | 1.13<br>(1.05-1.21)              | 1.08<br>(1.03-1.13)                           | 1.07<br>(1.02-1.12)              |
| TC/HDL (per unit increase)                        | 1.35 <sup>d</sup><br>(1.12-1.64)          | 1.24 <sup>d</sup><br>(1.01-1.53) | 1.01 <sup>d</sup><br>(0.86-1.19)              | 0.93 <sup>d</sup><br>(0.78-1.11) |

|         |             |             |             |             |
|---------|-------------|-------------|-------------|-------------|
| LDL/HDL | 1.14        | 1.02        | 0.86        | 0.81        |
|         | (0.83-1.56) | (0.73-1.41) | (0.69-1.08) | (0.63-1.03) |

---

<sup>a</sup>OHSUD (Out-of-Hospital Sudden Unexpected Death); HDL (High-density Lipoprotein); LDL (Low-density Lipoprotein); TG (Triglycerides); TC (Total Cholesterol); WHO (World Health Organization)

<sup>b</sup>Model 1 – Unadjusted

<sup>c</sup>Model 2 - Adjusted for age, sex

<sup>d</sup> $P < 0.05$

<sup>e</sup>All control subjects are the reference group for OHSUD victims both meeting and not meeting WHO criteria

1

2
